# Supplementary material for: Contribution of Genome-Wide Association Studies to Scientific Research: A Bibliometric Survey of the Citation Impacts of GWAS and Candidate Gene Studies Published during the Same Period and in the Same Journals
Source: PLOS journal article supplement (doi:10.1371/journal.pone.0051408), 2012-12-11
Supplement: S2 (10.1371/journal.pone.0051408.s002) [file journal.pone.0051408.s002]

Table S2 Years of publication of the 97 pairs of papers in the "GWAS" and "candidate-gene studies" groups

| <b>Year of publication</b> | <b>2005</b> | <b>2006</b> | <b>2007</b> | <b>2008</b> | <b>2009</b> |
|----------------------------|-------------|-------------|-------------|-------------|-------------|
| <b>Number of papers</b>    | 2           | 2           | 25          | 23          | 45          |
