# Supplementary material for: Contribution of Genome-Wide Association Studies to Scientific Research: A Bibliometric Survey of the Citation Impacts of GWAS and Candidate Gene Studies Published during the Same Period and in the Same Journals
Source: PLoS One. 2012 Dec 11;7(12):e51408. doi: 10.1371/journal.pone.0051408 (PMC3519865; doi:10.1371/journal.pone.0051408)
Supplement: Table S5 — PMID PUBMED identifiers of the 511 articles identified through MEDLINE research. (XLS) [file pone.0051408.s005.xls]

## Sheet: Table S5
Table S5 PMID PUBMED identifiers of the 511 articles identified through MEDLINE research
20041220
20041197
20041166
20032323
20018963
20018961
20011104
20004761
19965431
19956792
19956686
19956679
19944404
19944402
19944401
19940890
19936222
19931040
19931039
19915576
19915575
19915574
19915573
19915572
19913122
19903925
19898481
19896111
19876373
19862010
19862007
19862006
19859063
19853241
19853236
19851442
19838195
19838193
19838192
19836853
19836008
19823195
19820699
19820698
19820697
19819581
19816555
19815762
19812673
19812666
19812653
19812647
19801982
19801981
19801980
19801603
19801172
19798445
19798441
19786950
19779542
19779424
19767755
19767754
19767753
19767752
19763160
19763152
19763151
19759611
19759533
19749758
19749757
19749756
19741703
19741700
19734903
19734902
19734901
19734900
19733727
19732865
19730683
19720867
19716196
19716112
19714205
19713495
19713490
19710714
19710713
19706858
19701192
19701190
19700652
19693052
19684604
19684603
19684573
19684571
19680542
19680446
19680443
19679225
19675338
19664746
19664744
19657335
19654370
19652014
19649321
19648920
19648919
19648918
19641206
19630580
19630567
19630558
19629167
19622807
19620980
19615668
19609347
19608863
19602695
19602686
19602638
19597530
19597492
19597491
19595330
19593375
19584346
19584098
19581487
19578367
19578366
19578365
19578364
19578363
19576568
19571811
19571809
19571808
19567438
19561606
19561604
19557197
19557195
19557189
19557161
19557077
19546172
19543373
19542493
19541915
19539887
19536264
19535135
19525955
19525953
19503611
19503597
19503089
19503088
19492015
19491193
19483685
19483682
19483681
19471301
19471299
19465909
19465509
19458352
19453250
19453248
19448663
19448623
19448622
19448621
19448620
19448619
19436704
19434079
19434077
19430483
19430482
19430480
19430479
19426955
19424424
19424418
19416960
19412524
19412175
19411597
19411596
19407193
19404256
19396169
19390609
19390009
19381255
19380854
19375057
19373277
19369670
19369661
19369660
19369658
19369657
19369656
19361613
19349984
19349983
19343178
19338079
19337289
19330030
19330027
19327735
19307593
19305408
19303062
19300503
19300500
19300499
19300482
19293820
19287385
19285295
19282985
19270707
19268276
19268274
19266077
19265028
19264985
19260758
19249008
19249006
19238176
19238175
19234472
19234441
19232554
19230858
19223927
19219042
19217684
19215731
19215730
19212320
19200526
19198613
19198612
19198611
19198610
19198609
19197355
19197348
19189928
19185284
19182806
19174838
19174833
19174831
19169255
19169254
19169253
19165925
19165924
19165918
19165917
19165915
19151717
19151714
19148283
19148276
19144440
19141767
19139765
19136952
19136949
19132132
19132087
19126812
19122664
19118814
19118303
19112455
19110211
19098911
19096518
19095932
19092835
19084217
19079262
19079261
19079260
19079050
19079049
19074352
19073980
19061986
19060910
19060909
19060908
19060907
19060906
19057666
19043545
19029539
19027981
19026399
19026395
19011631
18997786
18997785
18988837
18987709
18987363
18981472
18978792
18978790
18978787
18976728
18976050
18974263
18974262
18971308
18952314
18950892
18949033
18947300
18940312
18923165
18923164
18852695
18849994
18849991
18846228
18836448
18834626
18802417
18820697
18802462
18769715
18759635
18758461
18758442
18714291
18711367
18711366
18711365
18691683
18688273
18677311
18676820
18676818
18654633
18650507
18622395
18604267
18587394
18584036
18566659
18542080
18509313
18505952
18488030
18488028
18488027
18485327
18483556
18464913
18463370
18455228
18454206
18454203
18454146
18443588
18439548
18438407
18438405
18437244
18437204
18403759
18398418
18391950
18385739
18385738
18385676
18379574
18372905
18372901
18369459
18355772
18349094
18327256
18319080
18319073
18313023
18311140
18283274
18264097
18264096
18262040
18256235
18252225
18252221
18208327
18184952
18179892
17999365
17999355
17968351
17966091
17961075
17953491
17947564
17934461
17924348
17924341
17924336
17924335
17924333
17892327
17873877
17804837
17785532
17728769
17703236
17701901
17676998
17676041
17668389
17668382
17668381
17668371
17660530
17641165
17637780
17634449
17634447
17634446
17632545
17618284
17605173
17600199
17572673
17558408
17554300
17529973
17529967
17506660
17463248
17463246
17460697
17447842
17435756
17401366
17401363
17360987
17357082
17357068
17293876
17262030
17200669
17095708
17072292
17068223
17057720
17047687
17002500
16965180
16933998
16862161
16847463
16826516
16773569
16741161
16736010
16715099
16715096
16699517
16685659
16648850
16642443
16619052
16582909
16532390
16468122
16429162
16415888
16408254
16380905
16341006
16254603
16252231
16244653
16080110
16012528
15937480
15931594
15920530
15793588
15716907
15716906
15645388
