# Supplementary material for: Contribution of Genome-Wide Association Studies to Scientific Research: A Bibliometric Survey of the Citation Impacts of GWAS and Candidate Gene Studies Published during the Same Period and in the Same Journals
Source: PLoS One. 2012 Dec 11;7(12):e51408. doi: 10.1371/journal.pone.0051408 (PMC3519865; doi:10.1371/journal.pone.0051408)
Supplement: Table S7 — PMID PUBMED identifiers of the 211 GWAS articles conserved for candidate-gene study research. (XLS) [file pone.0051408.s007.xls]

## Sheet: Table S7
Table S7 PMID PUBMED identifiers of the 211 GWAS articles conserved for candidate-gene study research
15761122
16252231
16614226
16648850
17053149
17053108
17068223
17293876
17447842
17357082
17434869
17435756
17401366
17401363
17529974
17478679
17478681
17529967
17460697
17668382
17554261
17554260
17558408
17529973
17611496
17658951
17641165
17632509
17618283
17603472
17603485
17660530
17637780
17634449
17634447
17632545
17618284
17690259
17671248
17804836
17767159
17767157
17952075
17934461
17997608
17982456
17999355
18084291
18204446
18204098
18193046
18252221
18282107
18264098
18239089
18369459
18264097
18264096
18327257
18403759
18385739
18385738
18327256
18311140
18445777
18369103
18439552
18391951
18391952
18483556
18464913
18455228
18439548
18385676
18372905
18372901
18488026
18471798
18463370
18454146
18604267
18488028
18660810
18846228
18650507
18622395
18758464
19165924
19165918
18711367
18711366
18711365
18794855
18760390
18776911
18940312
18758461
18849993
19043545
18981472
18976728
18849994
18849991
18836448
18820697
19096518
19074352
18997786
18997785
18978790
18834626
19060911
19148276
19132087
19118814
19110211
19084217
19079262
19079260
19060910
19176441
19185284
19169255
19169254
19169253
19151714
19136952
19136949
19122664
19242412
19197363
19300500
19300499
19300482
19282985
19268276
19230858
19219042
19198612
19198611
19198610
19198609
19182806
19305409
19287384
19303062
19270707
19198613
19426955
19404256
19375057
19349984
19349983
19330030
19412176
19557197
19536264
19465909
19458352
19448622
19448621
19430483
19412175
19609347
19525955
19503088
19483685
19483682
19483681
19714205
19706858
19664746
19620980
19597491
19578366
19578365
19578364
19571811
19561606
19491193
19779542
19763160
19684603
19684573
19648920
19648919
19648918
19812673
19798445
19767754
19767753
19749758
19749757
19734903
19734902
19734901
19734900
19956686
19936222
19862010
19853236
19838193
19820699
19820698
20041166
20018961
19915576
19915575
19915574
19915573
19915572
